# Supplementary material for: Facile Fabrication of NIR-Responsive Alginate/CMC Hydrogels Derived through IEDDA Click Chemistry for Photothermal-Photodynamic Anti-tumor Therapy
Source: Preprints.org preprint supplement (doi:10.20944/preprints202311.1393.v1), 2023-11-22
Supplement: Supplementary file 1 [file supplementary]

**Supplementary Information**

**Facile fabrication of NIR-responsive Alginate/CMC hydrogels derived through IEDDA click chemistry for photothermal-photodynamic anti-tumor therapy**

Ali Rizwan1, Israr Ali1, Sung-Han Jo2, Trung Thang Vu1, Yeong-Soon Gal3, Yong Hyun Kim1, Sang-Hyug Park2*, Kwon Taek Lim1,4*

1 Department of Smart Green Technology Engineering, Pukyong National University, Busan, 48513, Republic of Korea

2 Industry 4.0 Convergence Bionics Engineering, Pukyong National University, Busan 48513, Republic of Korea

3 Department of Fire Safety, Kyungil University, Gyeongsan, 38428, Gyeongsangbuk-do, Korea

4 Institute of Display Semiconductor Technology, Pukyong National University, Busan, 48513, Republic of Korea

***** Corresponding authors at: Pukyong National University, Busan, 48513, Republic of Korea.

E-mail: [ktlim@pknu.ac.kr](mailto:ktlim@pknu.ac.kr), shpark@pukyong.ac.kr

Tel: +82-51-629-6406

**Fig. S1** Photographic images of fabricated hydrogels derived from bio-conjugated polysaccharide

**Fig. S2** Photothermal effect of NIR irradiation on hydrogels
